# Supplementary material
Source: PubMed Central journal article supplement (PMC6118073)

**Web Table 1.** Comparison of Fecundability Odds Ratios (FOR) for Fat-Soluble Micronutrients and Time to Pregnancy (TTP) Obtained From Complete-Case Analysis and Several Different Methods of Imputing Outcome Information on 128 Women Who Withdrew Early From the Study

| Micronutrient         | Complete-Case <sup>a</sup> | Survival Probability Using Kaplan-Meier MI <sup>b</sup> | Pregnant in 1 Cycle After Withdrawal <sup>c</sup> | Not Pregnant <sup>d</sup> |
|-----------------------|----------------------------|---------------------------------------------------------|---------------------------------------------------|---------------------------|
|                       | FOR (95% CI)               | FOR (95% CI)                                            | FOR (95% CI)                                      | FOR (95% CI)              |
| Zeaxanthin (µg/dL)    | 1.12 (0.89, 1.39)          | 1.05 (0.85, 1.31)                                       | 1.00 (0.81, 1.24)                                 | 1.17 (0.94, 1.46)         |
| Cryptoxanthin (µg/dL) | 1.06 (0.88, 1.28)          | 1.03 (0.86, 1.23)                                       | 1.01 (0.85, 1.21)                                 | 1.08 (0.90, 1.30)         |
| Lycopene (µg/dL)      | 1.19 (0.99, 1.43)          | 1.18 (0.99, 1.41)                                       | 1.17 (0.99, 1.38)                                 | 1.18 (0.99, 1.42)         |
| α-Carotene (µg/dL)    | 1.17 (1.00, 1.36)          | 1.08 (0.93, 1.26)                                       | 1.05 (0.90, 1.21)                                 | 1.22 (1.05, 1.42)         |
| β-Carotene (µg/dL)    | 1.12 (0.98, 1.28)          | 1.04 (0.92, 1.19)                                       | 1.02 (0.90, 1.15)                                 | 1.18 (1.04, 1.35)         |
| α-Tocopherol (µg/dL)  | 1.23 (0.85, 1.78)          | 1.17 (0.82, 1.67)                                       | 1.14 (0.81, 1.61)                                 | 1.29 (0.90, 1.86)         |
| γ-Tocopherol (µg/dL)  | 0.83 (0.62, 1.11)          | 0.89 (0.67, 1.18)                                       | 0.94 (0.71, 1.23)                                 | 0.79 (0.59, 1.05)         |

CI, confidence interval; FOR, fecundability odds ratio; MI, multiple imputation.

<sup>a</sup> Potential pregnancy outcomes of women who withdrew early were not imputed.

<sup>b</sup> Potential pregnancy outcomes of women who withdrew early were imputed using the survival probability derived from the complete case analysis using Kaplan-Meier multiple imputation (1,000 imputations).

<sup>c</sup> Potential pregnancy outcomes of women who withdrew early were imputed assuming they achieved pregnancy in the cycle after withdrawal.

<sup>d</sup> Potential pregnancy outcomes of women who withdrew early were imputed assuming they did not achieve pregnancy after six cycles.

*Note:* Fat soluble micronutrient concentrations were log-transformed. All models adjusted for (year), body mass index (kg/m<sup>2</sup>), race (white or non-white), cigarette smoking (never, few, or daily), alcohol (never, sometimes, or often), physical activity (high, moderate, or low), income (<\$20,000, \$20,000-\$40,000, \$40,000-\$75,000, \$75,000-\$100,000, or >\$100,000), vitamin use (yes or no), total cholesterol concentration (mg/dL), treatment arm (low dose aspirin or placebo), and study sites.

**Web Figure 1.** Comparison of fat-soluble micronutrients by pregnancy status measured in the Effects of Aspirin in Gestation and Reproduction (EAGeR) trial ( $N = 1,207$ ) and the National Health and Nutrition Examination Survey (NHANES), 2005–2006. Closed circle, pregnant women ( $n = 787$ ); open diamond, nonpregnant women ( $n = 294$ ); shaded square, women who withdrew ( $n = 126$ ).

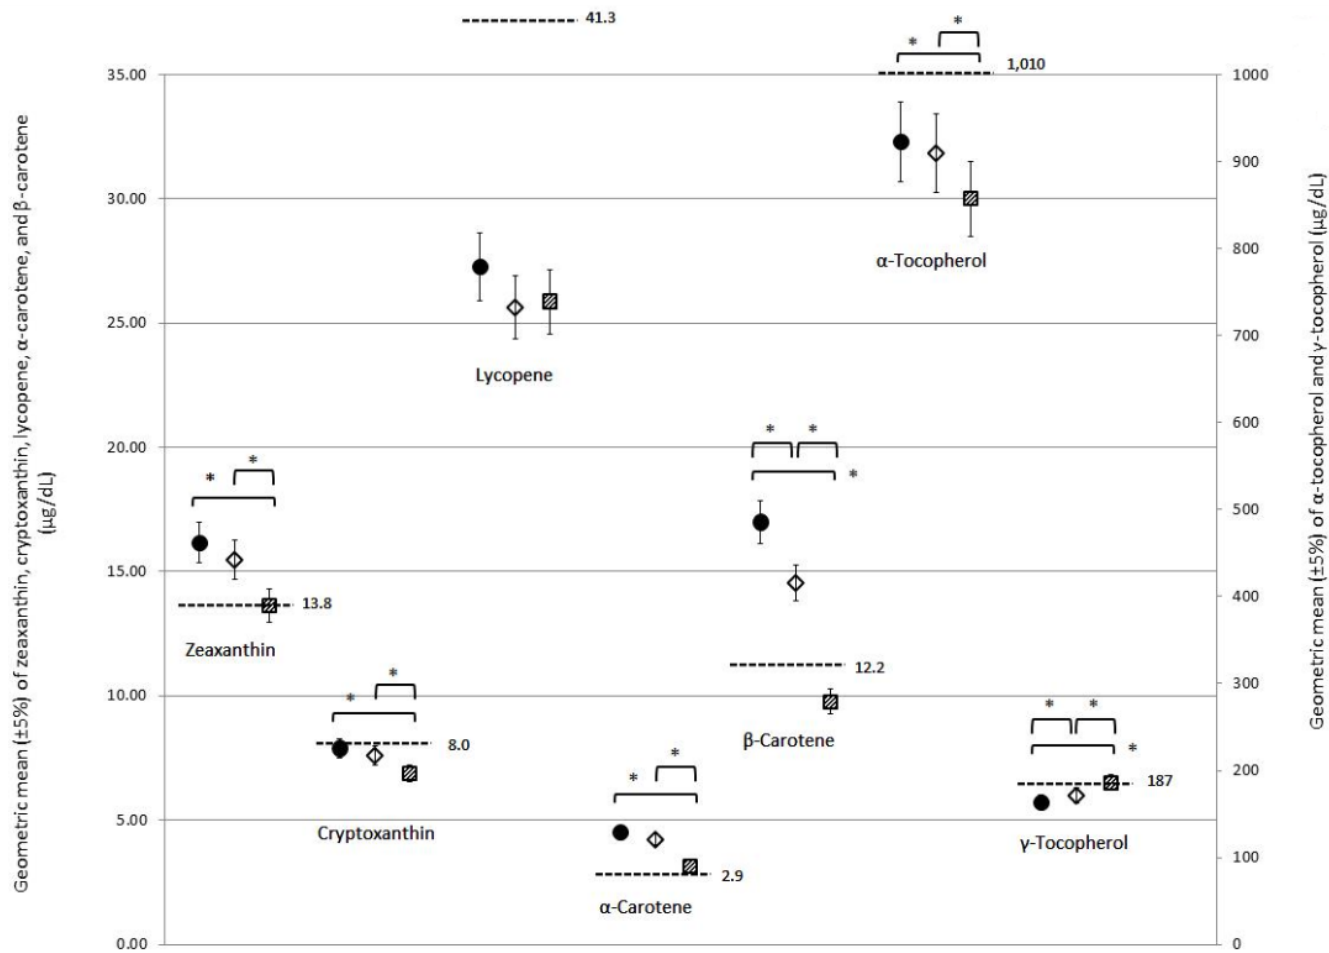

**Web Figure 2.** Directed acyclic graphs illustrating potential associations between preconception fat-soluble micronutrients and time to pregnancy (TTP) in the EAGeR Trial.

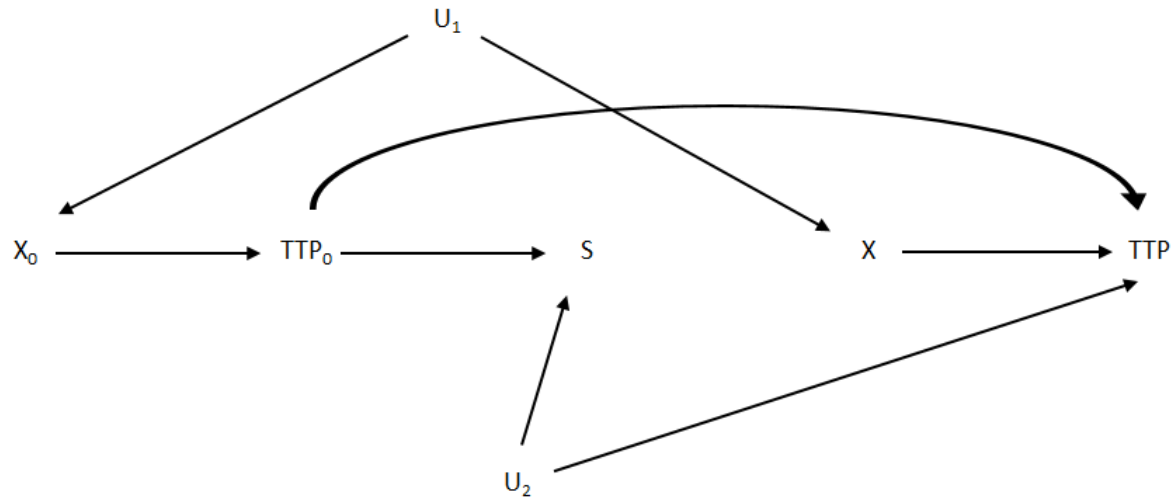

- X: Current serum micronutrient concentrations
- $X_0$ : Past serum micronutrient concentrations
- S: Reproductive history (EAGeR enrollment criteria)
- TTP: Prospective time to pregnancy (study outcome)
- $TTP_0$ : Past time to pregnancy
- $U_1$ : Unmeasured confounder (e.g., dietary behavior)
- $U_2$ : Unmeasured confounder (e.g., genetic factor)

**Web Figure 3.** Association between  $\alpha$ -carotene and time to pregnancy (TTP) adjusted for unmeasured confounders. **A)** Adjusted for  $U_1$  (e.g., dietary behavior); **B)** adjusted for  $U_2$  (e.g., genetic factor), where associations between  $U_2$  and TTP were set to fecundability odds ratios (FOR) of 0.7 (open squares) and 0.5 (closed circles), respectively; **C)** adjusted for previous fecundability ( $TTP_0$ ),  $U_1$ , and  $U_2$ . Dashed line indicates FOR unadjusted for unmeasured confounders (FOR = 1.17).

**A.**

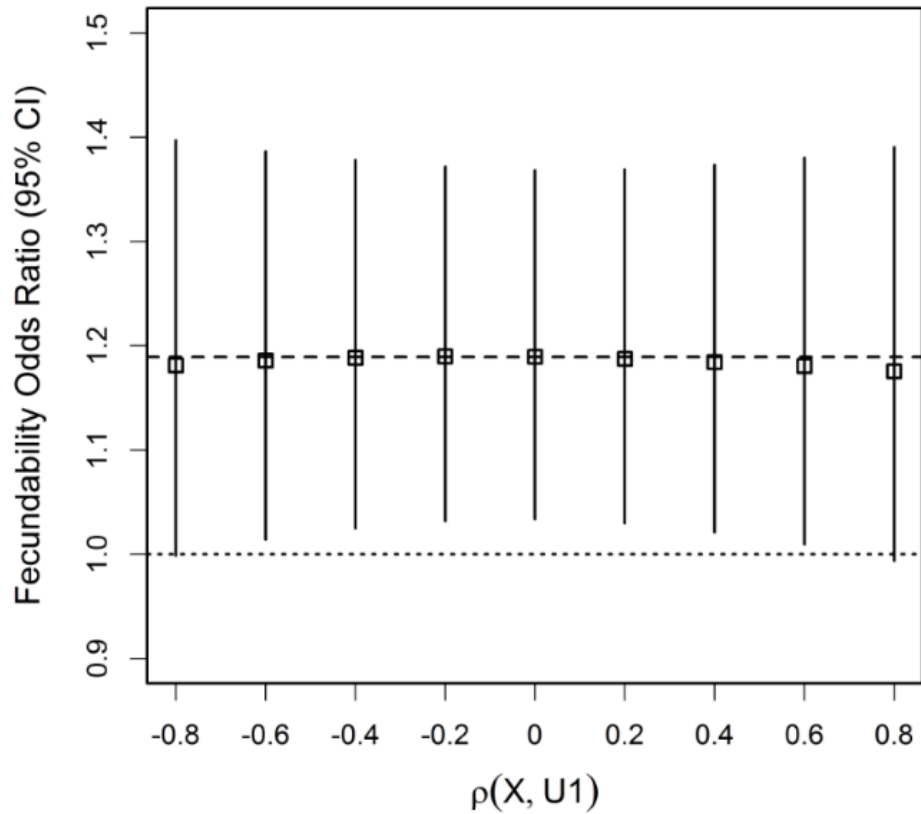

**B.**

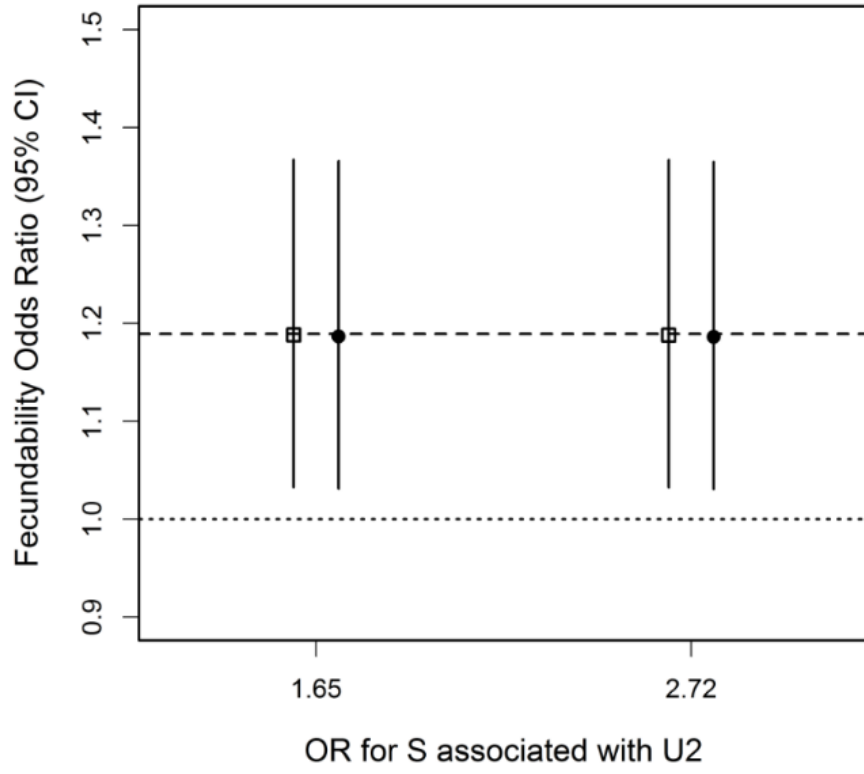

**C.**

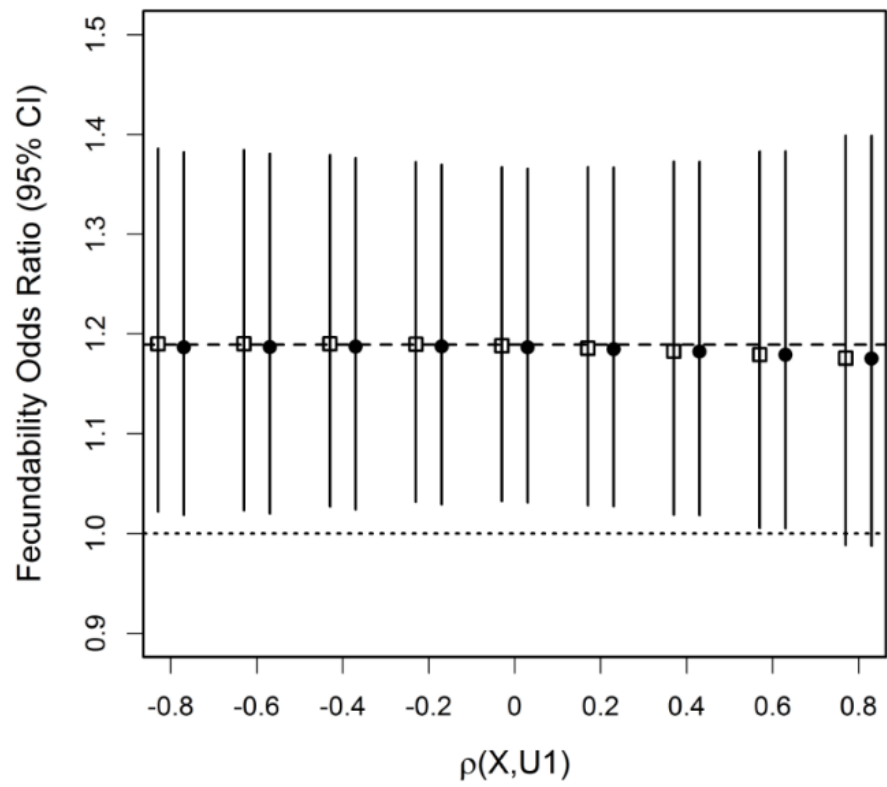

Supplement: kwy101_kim_web_material_final.pdf [file kwy101_kim_web_material_final.pdf]
